# Supplementary material for: microRNA-630 Regulates Underglycosylated IgA1 Production in the Tonsils by Targeting TLR4 in IgA Nephropathy
Source: PubMed Central journal article supplement (PMC7725902; doi:10.3389/fimmu.2020.563699), 2020-11-26
Supplement: DataSheet_1.pdf [file DataSheet_1.pdf]

**Title: microRNA-630 regulates underglycosylated IgA1 production  
in the tonsils by targeting TLR4 in IgA nephropathy**

**Supplemental materials**

**Supplemental Table 1. Characteristics in IgAN group and CT group**

|                                   | <b>IgAN group<br/>(n=27)</b> | <b>CT group<br/>(n=20)</b> |
|-----------------------------------|------------------------------|----------------------------|
| Age (years)                       | 27.5 ± 4.5                   | 21.2 ± 9.6*                |
| Gender (male/female)              | 12/15                        | 13/7                       |
| GFR (mL/min/1.73 m <sup>2</sup> ) | 96.5 ± 22.3                  | 133.1 ± 35.7               |
| Cre (umol/L)                      | 91.5 ± 34.5                  | 77.3 ± 20.1*               |
| Hematuresis (/hpf)                | 89.4 ± 55.2                  | N.D.                       |
| PRO (g/day)                       | 1.2 ± 0.6                    | N.D.                       |
| ALB (g/L)                         | 32.8 ± 6.7                   | 40.2 ± 5.5*                |

**Abbreviation:** GFR: glomerular filtration rate Cre: creatinine; PRO: urine protein; ALB: albumin; hpf: high power field; N.D.: non-detected. \*p<0.05, compared with IgAN group.

**Supplemental Table 2. The primer sequences of the genes for RT-PCR**

| <b>Genes</b> | <b>Forward primer (5'-3')</b> | <b>Reverse primer (5'-3')</b> |
|--------------|-------------------------------|-------------------------------|
| C1GALT1      | GACCCTGAAGAACCCATTTACTT       | TATCCTGCTCCTCCACTCAT          |
| COSMC        | GAAGATGCTGATGGAAAAGATG        | CCTGGTTGGGGTGATAAGTC          |
| BAFF         | CCACAGAAAGGGAGCAGTCAC         | TGGGAGGATGGAAACACACT          |
| BAFF-R       | CCCTGGACAAGGTCATCATT          | TCTTGGTGGTCACCAGTTCA          |
| IL-1 $\beta$ | GGTGTTCTCCATGTCCTTTGTA        | GCTGTAGAGTGGGCTTATCATC        |
| IL-8         | CTGGCCGTGGCTCTCTTG            | CCTTGGCAAAACTGCACCTT          |
| GAPDH        | GGAGCGAGATCCCTCCAAAAT         | GGCTGTTGTCATACTTCTCATGG       |

**Supplemental Table 3. Differential expression of miRNAs in tonsil tissue  
between IgAN group and CT group IgAN patients**

| <b>miRBase accession number</b> | <b>miRNA Name</b> | <b>Fold change (IgAN/CT)</b> |
|---------------------------------|-------------------|------------------------------|
| MIMAT0004518                    | hsa-miR-16-2-3p   | 2.100056477                  |
| MIMAT0015087                    | hsa-miR-514b-5p   | 2.622173944                  |
| MIMAT0004514                    | hsa-miR-29b-1-5p  | 2.808752111                  |
| MIMAT0000088                    | hsa-miR-30a-3p    | 3.475058413                  |
| MIMAT0000416                    | hsa-miR-1         | 3.735226739                  |
| MIMAT0000770                    | hsa-miR-133b      | 4.598821713                  |
| MIMAT0004776                    | hsa-miR-505-5p    | 13.452062                    |
| MIMAT0012735                    | hsa-miR-718       | 0.032664299                  |
| MIMAT0001618                    | hsa-miR-191-3p    | 0.046895733                  |
| MIMAT0005789                    | hsa-miR-513c-5p   | 0.056891883                  |
| MIMAT0004609                    | hsa-miR-149-3p    | 0.181051182                  |
| MIMAT0004595                    | hsa-miR-135a-3p   | 0.208670017                  |
| MIMAT0003299                    | hsa-miR-630       | 0.222205853                  |
| MIMAT0005788                    | hsa-miR-513b      | 0.317318002                  |
| MIMAT0004957                    | hsa-miR-760       | 0.363575708                  |
| MIMAT0020924                    | hsa-miR-642a-3p   | 0.402214386                  |
| MIMAT0002174                    | hsa-miR-484       | 0.488095418                  |
| MIMAT0005942                    | hsa-miR-1288      | 0.03506508                   |
| MIMAT0005573                    | hsa-miR-1225-3p   | 0.072123508                  |
| MIMAT0022496                    | hsa-miR-5703      | 0.096922813                  |
| MIMAT0018981                    | hsa-miR-4459      | 0.209741136                  |
| MIMAT0019213                    | hsa-miR-3162-3p   | 0.276249476                  |
| MIMAT0018100                    | hsa-miR-3676-3p   | 0.3398749                    |
| MIMAT0019791                    | hsa-miR-4697-5p   | 0.359808669                  |
| MIMAT0023252                    | hsa-miR-5787      | 0.385807819                  |
| MIMAT0019835                    | hsa-miR-4721      | 0.422333113                  |
| MIMAT0016906                    | hsa-miR-4274      | 0.424772775                  |
| MIMAT0019715                    | hsa-miR-4651      | 0.432839534                  |
| MIMAT0019006                    | hsa-miR-4478      | 0.459201094                  |

**Supplemental table 4. Part of predicted target genes of miR-630**

| Target Gene | Gene Name                                                          |
|-------------|--------------------------------------------------------------------|
| TLR4        | toll-like receptor 4                                               |
| CD28        | CD28 molecule                                                      |
| CD80        | CD80 molecule                                                      |
| MAPK1       | mitogen-activated protein kinase 1                                 |
| PTPRC       | protein tyrosine phosphatase, receptor type, C                     |
| BCL2L       | BCL2-like 2                                                        |
| AKAP10      | A kinase (PRKA) anchor protein 10                                  |
| GNB1        | guanine nucleotide binding protein (G protein), beta polypeptide 1 |
| MAOB        | monoamine oxidase B                                                |
| HEATR3      | HEAT repeat containing 3                                           |
| FBXO30      | F-box protein 30                                                   |
| PIGK        | phosphatidylinositol glycan anchor biosynthesis, class K           |
| CRISP3      | cysteine-rich secretory protein 3                                  |
| TFG         | TRK-fused gene                                                     |
| PTPN22      | protein tyrosine phosphatase, non-receptor type 22 (lymphoid)      |
| TMED7       | transmembrane emp24 protein transport domain containing 7          |
| CYBB        | cytochrome b-245, beta polypeptide                                 |
| SP100       | SP100 nuclear antigen                                              |
| LYST        | lysosomal trafficking regulator                                    |
| POLR3A      | polymerase (RNA) III (DNA directed) polypeptide A                  |
| EXO1        | exonuclease 1                                                      |
| RAG1        | recombination activating gene 1                                    |
| CD226       | CD226 molecule                                                     |
| LCP1        | lymphocyte cytosolic protein 1 (L-plastin)                         |
| PTPN22      | protein tyrosine phosphatase, non-receptor type 22 (lymphoid)      |
| BCL11A      | B-cell CLL/lymphoma 11A (zinc finger protein)                      |
| C5AR1       | complement component 5a receptor 1                                 |

---

|         |                                                                 |
|---------|-----------------------------------------------------------------|
| PTGER3  | prostaglandin E receptor 3                                      |
| DCDC2   | doublecortin domain containing 2                                |
| PLAA    | prostaglandin E receptor 3 (subtype EP3)                        |
| INHBB   | inhibin, beta B                                                 |
| CYBB    | cytochrome b-245, beta polypeptide                              |
| ZNF148  | zinc finger protein 148                                         |
| MPO     | myeloperoxidase                                                 |
| APAF1   | apoptotic peptidase activating factor 1                         |
| PLA2G4C | phospholipase A2, group IVC (cytosolic, calcium-independent)    |
| SELE    | selectin E                                                      |
| CXCL13  | chemokine (C-X-C motif) ligand 13                               |
| PKHD1   | polycystic kidney and hepatic disease 1 (autosomal recessive)   |
| WWTR1   | WW domain containing transcription regulator 1                  |
| GREM1   | gremlin 1, DAN family BMP antagonist                            |
| EXO1    | exonuclease 1                                                   |
| VTCN1   | V-set domain containing T cell activation inhibitor 1           |
| CD1C    | CD1c molecule                                                   |
| LIF     | leukemia inhibitory factor                                      |
| BTLA    | B and T lymphocyte associated                                   |
| PAG1    | phosphoprotein associated with glycosphingolipid microdomains 1 |
| TP63    | tumor protein p63                                               |
| PTGER3  | prostaglandin E receptor 3 (subtype EP3)                        |

---

## Supplemental figure 1

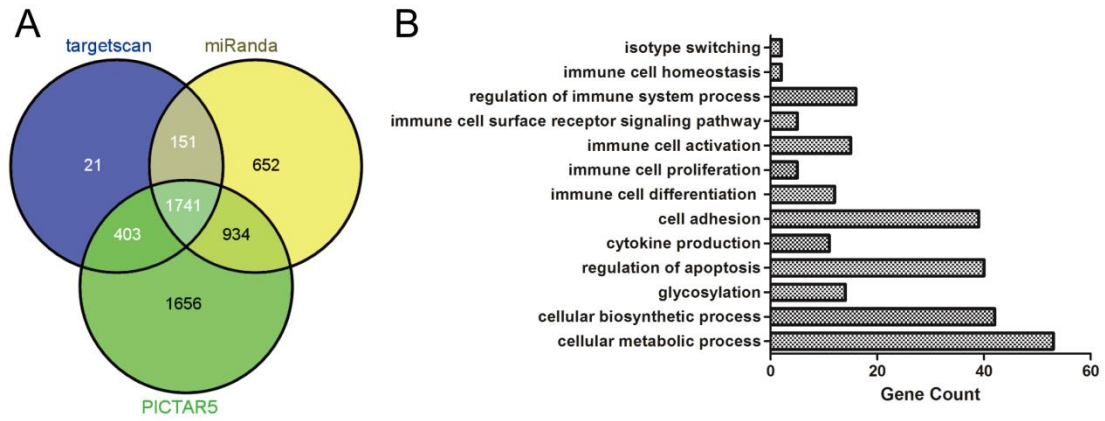

**Figure S1. Bioinformatics analysis of the target genes of miR-630.** (A) The common target genes of miR-630 predicted by Targetscan, miRanda and PicTar. (B) The Gene Ontology (GO) enrichment analysis of candidate target genes was conducted in DAVID database.

**Supplemental figure 2**

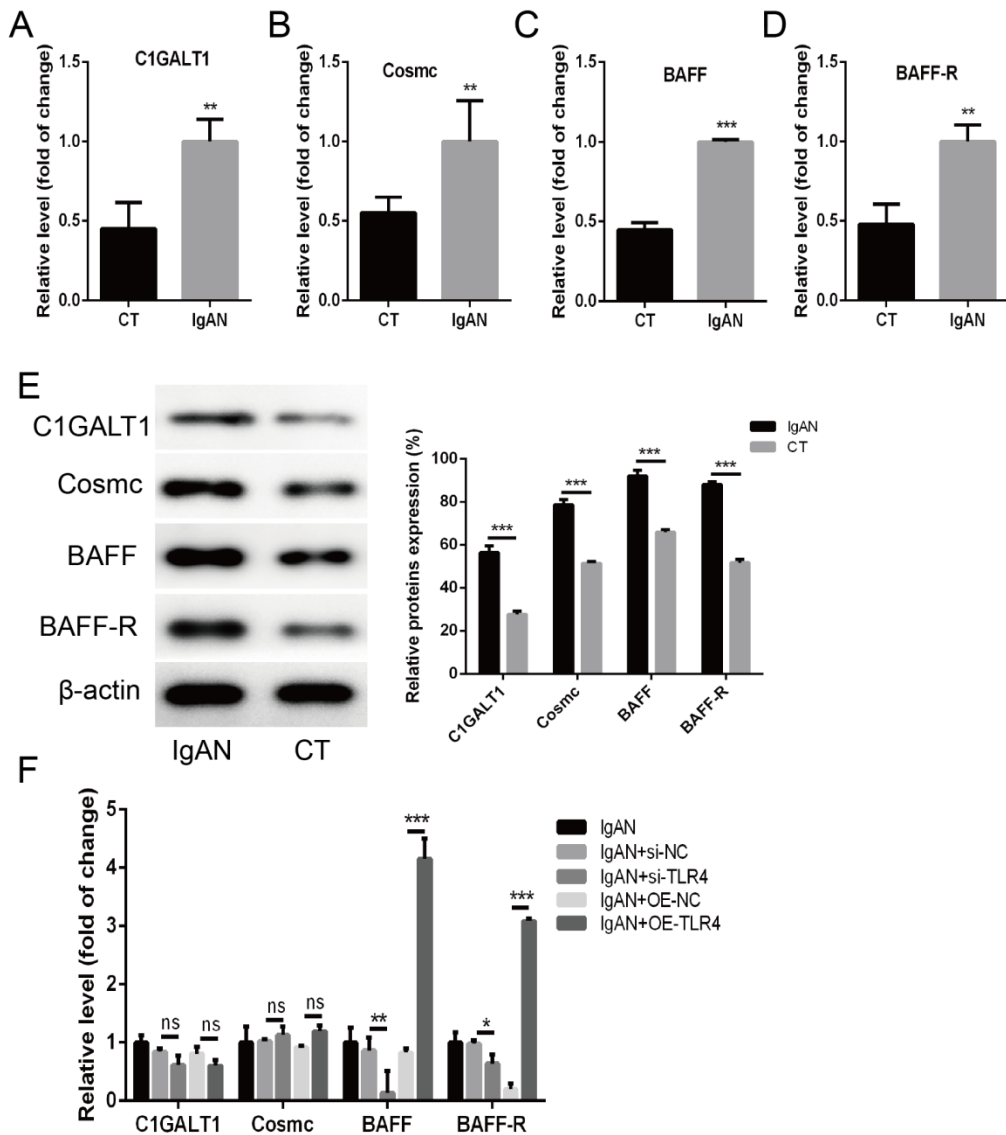

**Figure S2. The expressions of related markers of affecting the expression/secretion/glycosylation of IgA.** (A-D) The expressions of C1GALT1, Cosmc, BAFF and BAFF-R were detected by RT-PCR in TMC from the IgAN group and CT group. (E) The protein levels of C1GALT1, Cosmc, BAFF and BAFF-R were measured by Western blot in TMC from the IgAN group and CT group. (F) The levels of C1GALT1, Cosmc, BAFF and BAFF-R were measured by RT-PCR when knocking down the expression of TLR4 by using TLR4 siRNA or overexpression of TLR4 in TMC. The data were expressed as mean  $\pm$  SD, \*\* $p < 0.01$ . \*\*\*  $p < 0.001$ . IgAN: IgA nephropathy; CT: chronic tonsillitis. NC: negative control. BAFF: B cell activating factor. BAFF-R: B cell activating factor receptor.
